# Supplementary material
Source: PubMed Central journal article supplement (PMC9019102)
Supplement: 41598_2022_10370_MOESM1_ESM.pdf [file 41598_2022_10370_MOESM1_ESM.pdf]

## Supplementary Appendix

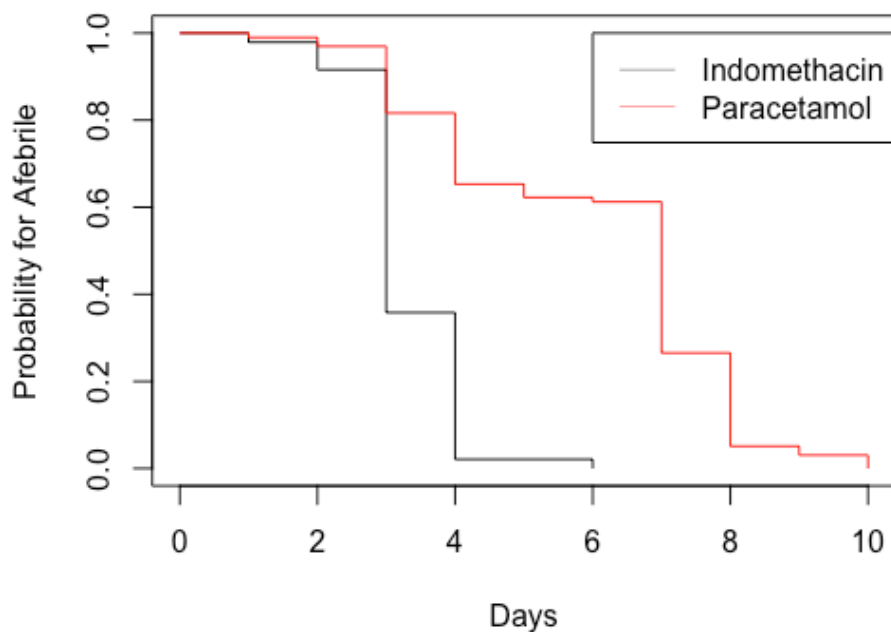

Fig. S1 Kaplan-Meir estimate for fever reduction

| Covariates       | Reg. Coeff | Exp (Coef) | z      | Pr(> z ) | Lower 0.95 | Upper 0.95 |
|------------------|------------|------------|--------|----------|------------|------------|
| Treatment        | -2.56955   | 0.07657    | -8.928 | <2e-16   | 0.04356    | 0.1346     |
| Age              | 0.013903   | 1.014      | 1.463  | 0.1436   | 0.99528    | 1.0331     |
| CT Score         | -0.090987  | 0.91303    | -1.724 | 0.0848   | 0.82328    | 1.0126     |
| Gender           | -0.195889  | 0.822104   | -0.878 | 0.3799   | 0.53093    | 1.273      |
| CRP on admission | 0.005697   | 1.005713   | 0.876  | 0.3812   | 0.99297    | 1.0186     |
| Comorbidity      | -0.229415  | 0.794999   | -1.21  | 0.2262   | 0.54827    | 1.1528     |

Table S1: Cox Regression results for Fever with either indomethacin or paracetamol

treatment; N=193; N<sub>indomethacin</sub> = 95; N<sub>Paracetamol</sub> = 98

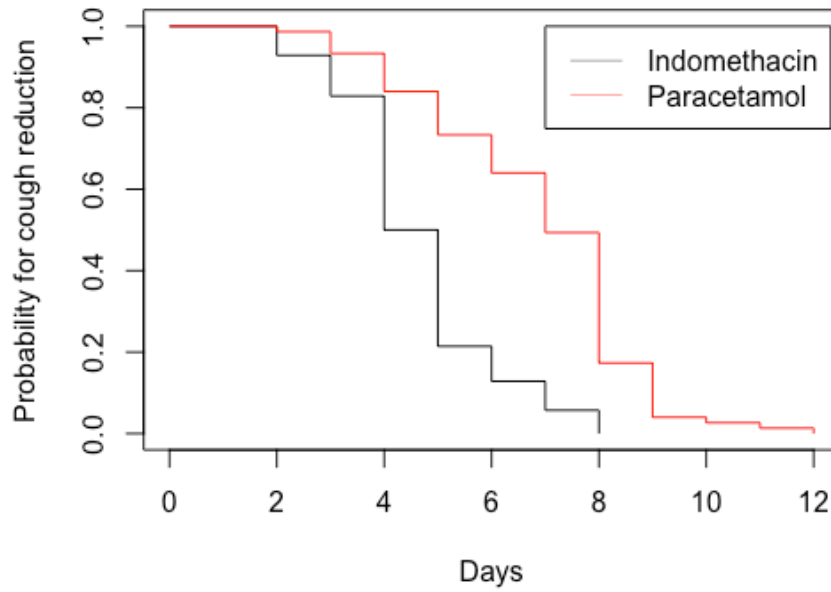

Fig S2. Kaplan-Meier estimate for cough reduction

| Covariates         | Reg. Coeff | exp(coef) | z         | Pr(> z ) | Lower 0.95 | Upper 0.95 |
|--------------------|------------|-----------|-----------|----------|------------|------------|
| Treatment          | -2.314587  | 0.098807  | -7.82E+00 | 5.48E-15 | 0.0553     | 0.1766     |
| age                | 0.012633   | 1.012713  | 1.36      | 0.17381  | 0.9944     | 1.0313     |
| CT Score           | -0.164531  | 0.848291  | -2.919    | 0.00352  | 0.7596     | 0.9474     |
| Gender             | -0.173516  | 0.840704  | -0.726    | 0.46779  | 0.5263     | 1.3429     |
| CRP on admission   | 0.002738   | 1.002742  | 0.392     | 0.69537  | 0.9891     | 1.0166     |
| Comorbidity        | -0.030203  | 0.970248  | -1.66E-01 | 0.86838  | 0.6788     | 1.3868     |
| Cough on admission | -0.251273  | 0.77781   | -5.104    | 3.32E-07 | 0.7063     | 0.8566     |

Table S2: Cox Regression results for Cough with either indomethacin or paracetamol

treatment; N=145; N<sub>indomethacin</sub> = 70; N<sub>Paracetamol</sub> = 75

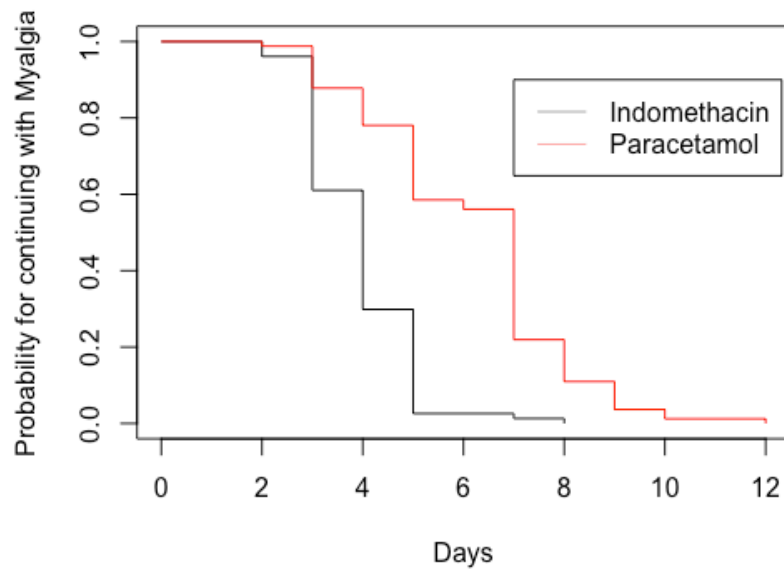

Fig S3. Kaplan – Meir estimate for continuation of Myalgia

| Covariates       | Reg. Coeff | exp(coef) | z         | Pr(> z ) | Lower 0.95 | Upper 0.95 |
|------------------|------------|-----------|-----------|----------|------------|------------|
| Treatment        | -2.035077  | 0.13067   | -7.36E+00 | 1.82E-13 | 0.07601    | 0.2246     |
| Age              | 0.004097   | 1.004106  | 0.433     | 0.665    | 0.98565    | 1.0229     |
| CT Score         | -0.013054  | 0.987031  | -0.242    | 0.809    | 0.88808    | 1.097      |
| Gender           | 0.17193    | 1.187594  | 0.784     | 0.433    | 0.77255    | 1.8256     |
| CRP on admission | 0.00858    | 1.008617  | 1.258     | 0.208    | 0.99522    | 1.0222     |
| Comorbidity      | 0.108482   | 1.114585  | 0.588     | 0.557    | 0.77626    | 1.6004     |

Table S3 : Cox Regression results for Myalgia with either indomethacin or paracetamol

treatment; N=159; N<sub>indomethacin</sub> = 77; N<sub>Paracetamol</sub> = 82
